# Supplementary material
Source: Springer Nature journal article supplement (https://www.springermedizin.de/resource/supplementary/13098_2011_171_MOESM3_ESM.pdf/9670626)

FN

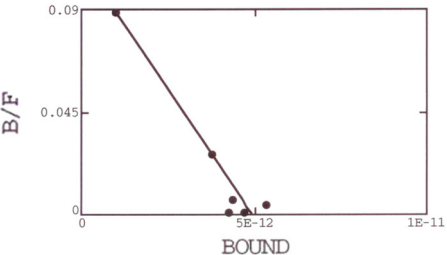

AGE-FN

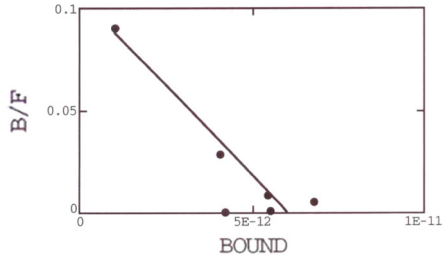

Supplement: MOESM3 [file 9670626]
